# Influence of Arm Swing on Cost of Transport during Walking

Myriam L. de Graaf<sup>1,#</sup>

Juul Hubert<sup>1,#</sup>

Han Houdijk<sup>1,4</sup>

Sjoerd M. Bruijn<sup>1,2,3,\*</sup>

# These authors contributed equally to this work

<sup>1</sup> Department of Human Movement Sciences, Vrije Universiteit Amsterdam, Amsterdam Movement Sciences, Amsterdam, The Netherlands

<sup>2</sup> Institute of Brain and Behavior Amsterdam

<sup>3</sup> Orthopaedic Biomechanics Laboratory, Fujian Medical University, Quanzhou, Fujian, PR China

<sup>4</sup> Department of Research and Development, Heliomare Rehabilitation, Wijk aan Zee, the Netherlands

\* Author for correspondence, s.m.Bruijn@gmail.com

## KEYWORDS

arm swing, cost of transport, locomotion, vertical angular momentum, ground reaction moment, energetic cost of walking

## SUMMARY STATEMENT

Excessive arm swing reduces the vertical angular momentum and ground reaction moment, but not necessarily the energetic cost of transport.

23 **ABSTRACT**

24 Normal arm swing plays a role in decreasing the cost of transport during walking.  
25 However, whether excessive arm swing can reduce the cost of transport even further is  
26 unknown. Therefore, we tested the effects of normal and exaggerated arm swing on the  
27 cost of transport in the current study. Healthy participants ( $n=12$ ) walked on a treadmill  
28 (1.25 m/s) in seven trials with different arm swing amplitudes (in-phase, passive  
29 restricted, active restricted, normal, three gradations of extra arm swing), while  
30 metabolic energy cost and the vertical angular momentum (VAM) and ground reaction  
31 moment (GRM) were measured.

32 In general, VAM and GRM decreased as arm swing amplitude was increased, except  
33 for in the largest arm swing amplitude condition. The decreases in VAM and GRM were  
34 accompanied by a decrease in cost of transport from in-phase walking (negative  
35 amplitude) up to a slightly increased arm swing (non-significant difference compared to  
36 normal arm swing). The most excessive arm swings led to an increase in the cost of  
37 transport, most likely due to the cost of swinging the arms. In conclusion, increasing arm  
38 swing amplitude leads to a reduction in vertical angular moment and ground reaction  
39 moments, but it does not lead to a reduction in cost of transport for the most excessive  
40 arm swing amplitudes. Normal or slightly increased arm swing amplitude appears to be  
41 optimal in terms of cost of transport in young and healthy individuals.

## 42 INTRODUCTION

43 Human locomotion distinguishes itself from that of many other vertebrates due to its  
44 predominantly two-legged nature. Therefore, it is not surprising that most research into  
45 human locomotion focuses on the lower extremities, while the contribution of the upper  
46 extremities is neglected. However, the arms do appear to play a significant role in  
47 locomotion. Studies have shown that people consume more energy when they do not  
48 swing their arms during walking (Collins et al., 2009a; Umberger, 2008). This indicates a  
49 cost-reducing function of arm swing. There is also evidence that arm swing may be  
50 involved in regulating the stability of locomotion (Meyns et al., 2013).

51 How arm swing is instigated during walking is not yet fully known. Some studies  
52 mention a predominantly passive nature, as a result of the dynamics of the linked body  
53 segments (Collins et al., 2009a; Gerdy, 1829; Jackson et al., 1978; Morton and Fuller,  
54 1952; Weber and Weber, 1836), where the arms would then function as passive  
55 pendulums. Other studies brought this idea into question as they found muscle activity in  
56 the upper extremities (Fernandez-Ballesteros et al., 1965; Kuhtz-Buschbeck and Jing,  
57 2012), thereby indicating an active origin of arm swing. However, the muscle activity is  
58 also present during walking when the arms are bound at the sides (Kuhtz-Buschbeck and  
59 Jing, 2012), and contains co-contraction of two agonistic parts of the deltoid (Pontzer et  
60 al., 2009) which points at either activation through central pattern generators (see Zehr  
61 & Duysens (2004)) or a more stabilizing function (Meyns et al., 2013). It has also been  
62 found that passive dynamics are sufficient to generate arm swing (Collins et al., 2009a;  
63 Jackson et al., 1978), but that the resulting amplitude and relative phase decrease  
64 significantly without muscle activity (Goudriaan et al., 2014). Together these findings  
65 seem to indicate a role for both active and passive components in the generation of arm  
66 swing amplitude.

67 Independent of how arm swing is executed, it appears to play an important part  
68 during human locomotion. However, what this role is exactly, is still unknown. Several  
69 hypotheses have been formulated, among which: (a) reducing vertical displacement of  
70 the center of mass (COM) (Hinrichs, 1990; Murray et al., 1967; Pontzer et al., 2009;

71 Umberger, 2008), (b) reducing angular momentum around the longitudinal axis (Bruijn  
72 et al., 2008; Bruijn et al., 2011; Collins et al., 2009a; Elftman, 1939; Hinrichs, 1990;  
73 Park, 2008); (c) reducing angular movement around the longitudinal axis (Fernandez-  
74 Ballesteros et al., 1965; Murray et al., 1967; Pontzer et al., 2009); (d) reducing the  
75 ground reaction moment (GRM) (Collins et al., 2009a; Li et al., 2001; Witte et al., 1991);  
76 (e) increasing (local) stability (Ortega et al., 2008) / balance recovery after perturbations  
77 (Bruijn et al., 2010; Hof, 2007; Marigold et al., 2002; Pijnappels et al., 2010); (f)  
78 facilitating leg movement (Meyns et al., 2013) and; (g) minimizing energetic costs  
79 (Collins et al., 2009a; Ortega et al., 2008; Umberger, 2008). These hypotheses cannot  
80 be seen entirely separate from each other, and are in some cases even entirely  
81 interdependent.

82 This study focusses on the relevance and interplay of three of the roles mentioned  
83 above, namely those in energetic cost, vertical angular momentum (VAM) and ground  
84 reaction moments (GRM). Arm swing is often viewed as a mechanism to decrease  
85 angular momentum of the whole body around the vertical axis (as mentioned in  
86 hypothesis b above). This idea is based on the observation that angular momentum of  
87 the arms is fairly equal in size, but opposite in direction to the momentum of the body  
88 (Elftman, 1939; Herr and Popovic, 2008). The change in VAM that results from leg action  
89 during walking can, therefore, be compensated by an opposite change in angular  
90 momentum through arm swing, thereby bringing the VAM closer to zero (Hinrichs, 1990).  
91 The direction of the VAM changes sign during double support, in preparation for the next  
92 step. This redirection can be carried out through the legs via the GRM, or, it can be  
93 (partially) performed through arm swing: when whole-body VAM is decreased through  
94 arm swing, the GRM that needs to be generated by the legs to redirect the VAM will be  
95 smaller. With that, the GRF and the forces that the legs need to generate will also be  
96 smaller (that is, if stride length and step width – both determining factors for the GRF  
97 moment arms – remain unchanged). By this action, a reduction of the whole-body VAM  
98 via the arm swing can lead to a decreased energy expenditure by the legs, because the  
99 leg muscles do not need to generate as large a GRM. If this were to lead to a decreased

100 total energy expenditure, the energy gain at the legs should be greater than a potential  
101 increase in energy expenditure by the arms, i.e. the arms should be more efficient in  
102 redirecting the VAM than the legs. This could indeed be the case, because of the  
103 suspected (largely) passive nature of arm swing that was discussed before.

104 Multiple studies have shown that normal arm swing indeed leads to a reduced VAM,  
105 when compared to walking without arm swing (Bruijn et al., 2008; Collins et al., 2009a;  
106 Elftman, 1939; Herr and Popovic, 2008; Hinrichs, 1990; Park, 2008), with an  
107 accompanying reduction in energy expenditure (Collins et al., 2009a; Ortega et al.,  
108 2008; Umberger, 2008). Since the VAM is not equal to zero during normal walking, an  
109 increase in arm swing amplitude could further decrease VAM. Whether this would then  
110 lead to a further reduced cost of transport is unknown. The arm muscles will likely need  
111 more activation to increase arm swing amplitude, where normal arm swing appears to be  
112 largely passive in nature (Gerdy, 1829; Kubo et al., 2004; Pontzer et al., 2009).

113 There are studies that have investigated the effect of arm swing amplitude on VAM  
114 and energetic costs during walking (e.g. Collins et al. (2009a)). To our knowledge, none  
115 of these have looked at arm swing with an amplitude larger than in normal walking.  
116 Including extra arm swing conditions can provide extra insight into the (mechanisms  
117 behind the) potential energetic cost reducing function of arm swing. Such insight could  
118 prove beneficial in multiple situations, e.g. people attempting to lose weight might prefer  
119 to use more energy while walking, while elite racewalkers or patients with an increased  
120 cost of transport might benefit from energy reducing adaptations.

121 This study aimed to clarify the relationship between arm swing amplitude and the  
122 energetic cost of walking, as well as the role of VAM and GRM herein. We hypothesized  
123 that: (1) when arm swing amplitude increases, VAM decreases, (2) when arm swing  
124 amplitude increases, GRM decreases, (3) a lower absolute VAM is accompanied by a  
125 lower energetic cost, and (4) a lower absolute GRM is accompanied by a lower energetic  
126 cost. We defined arm swing amplitude as the difference between the anteroposterior  
127 COM position of the two arms, where an arm swing in anti-phase with the legs leads to a  
128 positive amplitude and an arm swing in-phase with the legs leads to a negative

129 amplitude. With the resulting information, we hope to give a comprehensive answer on  
130 the influence of arm swing on the energetic cost of transport during walking.

131

## 132 **METHODS**

### 133 *Participants*

134 Twelve healthy subjects have been included in this study (see **Table 1**). The number  
135 of participants included was based on previous studies with a similar design (e.g. (Collins  
136 et al., 2009b)). Exclusion criteria were: any orthopedic or neurological disorders that  
137 impede gait, and an inability to walk for 5 straight minutes. The experiment was  
138 approved by the local ethical committee (Scientific and Ethical Review Board (VCWE),  
139 protocol VCWE-2017-040). Prior to the trials, all the participants were informed about the  
140 measurements and all signed the informed consent. Participants were free to ask  
141 questions at any time and to stop the test if needed.

142

143

**Table 1 - Participant characteristics**

|             | mean ± SD        |
|-------------|------------------|
| Sex         | 6 male, 6 female |
| Age (y)     | 22.83 ± 6.17     |
| Height (cm) | 179.94 ± 12.06   |
| Weight (kg) | 71.25 ± 17.25    |

144

*Values are expressed as means with standard deviations (SD).*

145

### 146 *Experiment*

147 All participants executed the seven trials, each lasting five minutes, while walking at  
148 a speed of 1.25 m/s on a Dual Belt Treadmill. They used a different arm swing amplitude  
149 for each trial: (1) normal, (2) held, (3) bound, (4) in-phase, (5) extra I, (6) extra II, (7)  
150 extra III. Trials were performed in randomized order, with a few exceptions: the normal  
151 condition was always done first to prevent conscious thoughts about arm swing from  
152 influencing the normal walking pattern, and the three extra conditions were always  
153 performed consecutively from smallest (*extra I*) to largest (*extra III*). Prior to starting

154 the measurements, the participants performed a practice trial to get used to the treadmill  
155 and equipment. Verbal instructions and a demonstration of the arm swing that had to be  
156 performed were given before each trial: (1) in the *normal* condition participants were told  
157 to walk like they always do; (2) in the *held* condition, participants held their arms  
158 straight along their body to prevent them from swinging; (3) the *bound* condition was  
159 similar to condition 2, only now the arms were bound to the waist with Velcro straps; (4)  
160 in the *in-phase* condition the participants were instructed to move their left arm forward  
161 with the left leg, and the right arm with the right leg; (5) in *extra I*, the participants were  
162 told to increase arm swing slightly as compared to normal, about 1/3 between normal  
163 arm swing and the horizontal; (6) In *extra II*, the arm swing had to be at about 2/3  
164 between the horizontal and normal arm swing; (7) in the *extra III* condition, participants  
165 were instructed to raise their leading arm up to the horizontal, i.e. parallel to the ground.  
166 The instructions for the three extra conditions were given at the same time, to allow the  
167 participant to compare the three amplitudes. Adherence to the conditions was visually  
168 monitored by the researchers and the participants were told to correct the arm swing  
169 when necessary. Participants had the opportunity to take a break after each trial.

170

### 171 *Measurements*

172 We measured: (1) respirometry data with a Cosmed Quark B2 (Cosmed BV, Italy)  
173 breath-by-breath respirometer, (2) kinematic data with 17 sensor Xsens MVN inertial  
174 sensor suit, sampled at 120 Hz (Xsens Technologies BV, Enschede, The Netherlands),  
175 and (3) kinetic data with force sensors in the Dual Belt Treadmill (Y-Mill, ForceLink B.V.,  
176 The Netherlands) at 1000 Hz.

177

### 178 *Data Analysis*

179 First, separate step cycles were identified by determining left heel strikes on the  
180 basis of local minima in the vertical position of the left heel. Then, to check whether the  
181 participants had followed the instructions, the arm swing amplitude was analyzed. This

182 was done by calculating the Centre of Mass (COM) position ( $\vec{r}_{COM,tot}$ ) for each arm, using  
183 Eqn. 1 with the upper arm, lower arm, and hand segments (s=3).

184

$$\vec{r}_{COM,tot} = \frac{\sum_{i=1}^s \vec{r}_{COM,i} \cdot m_i}{\sum_{i=1}^s m_i} \quad \text{Eqn. 1}$$

185 Arm swing amplitude was then calculated as the anteroposterior distance between  
186 the COM of the left arm and the COM of the right arm at every point in time. The peak  
187 arm swing amplitude of every stride was determined and averaged per condition. The  
188 arm swing amplitude was manually made negative for the in-phase condition after we did  
189 a visual check to see whether the arm swing really was in-phase with the legs.

190

### 191 **Cost of Transport**

192 To ensure steady state we only used respirometry data collected during the last two  
193 minutes of each trial for the energetic cost calculations. The energy consumption  $\dot{E}$  ( $\text{J s}^{-1}$ )  
194 was calculated from the oxygen consumption ( $\text{VO}_2$ ) and the respiratory exchange ratio  
195 (RER) using Eqn. 2 (Garby and Astrup, 1987).

196

$$\dot{E} (\text{J/s}) = (4.94 \cdot \text{RER} + 16.04) \cdot \text{VO}_2 (\text{mL/s}) \quad \text{Eqn. 2}$$

197

198 Hereafter, the energy consumption was normalized for body weight and speed to get  
199 the cost of transport in  $\text{J kg}^{-1} \text{m}^{-1}$ .

200

### 201 **Vertical Angular Momentum**

202 We calculated total-body COM using equation 1 with all segments. Next, we  
203 calculated the VAM around the center of mass as:

$$L = \sum_{i=1}^s I_i \omega_i + m_i (\vec{r}_{COM,i} - \vec{r}_{COM,tot}) \times (\vec{v}_{COM,i} - \vec{v}_{COM,tot}) \quad \text{Eqn. 3}$$



204 where  $L$  is the total-angular momentum,  $I_i$  is the inertia tensor of segment  $i$ ,  $\omega_i$  is the  
205 angular velocity,  $m$  is the mass,  $r$  are the position vectors,  $v$  is velocity. Since the term  
206  $I_i \cdot \omega_i$  is very small, we have ignored it in the current study. Contributions of the arms and  
207 legs to the total, whole-body VAM were also calculated. For this, only the three relevant  
208 segments for each extremity were input in the equations. The absolute mean values of  
209 the angular momenta per stride were expressed as a measure of the VAM magnitude for  
210 all conditions. Using the heel strike indices, VAM was also expressed as a function of the  
211 gait cycle, in order to gain a better understanding of the development of direction and  
212 magnitude of the VAM during an average stride.

213

#### 214 **Ground Reaction Forces and Moments**

215 Data from the Dual Belt force platform were filtered with a 20 Hz, 2<sup>nd</sup> order  
216 Butterworth filter. The ground reaction moment (GRM) is the moment around the vertical  
217 axis caused by the interaction between the feet and floor and knows two components: a  
218 pure moment under each individual foot (present during single and double stance), and a  
219 pure moment resulting from the force couple created by the horizontal ground reaction  
220 forces of both feet (only present during double stance). The ground reaction moment was  
221 calculated from the ground reaction force using the following equation (Li et al., 2001):

$$GRM = M_z - GRF_{ap}a_{ml} + GRF_{ml}a_{ap} \quad Eqn. 4$$

222

223 In this formula,  $GRM$  is the ground reaction moment around the vertical axis,  $M_z$  is  
224 the total vertical moment around the origin of the force platform,  $GRF$  is the measured  
225 ground reaction force, and  $a$  is the distance between the origin and the COP of the force  
226 platform. We calculated the mean absolute GRM value per stride as well as the mean  
227 cycle for every condition.

228

#### 229 **Step Parameters**

230 Spatiotemporal parameters can be freely chosen by the participants, meaning they  
231 can differ between trials. Therefore the step parameters have been analyzed as  
232 indicators to assess how the gait pattern changes as a result of the changes in arm swing  
233 amplitude. Step width was calculated as the mean difference between the minimal and  
234 maximal x-coordinate of the COP position per gait cycle. Stride frequency was calculated  
235 from the time difference between subsequent left heel strikes.

236

### 237 *Statistics*

238 Statistical analysis was performed using IBM SPSS Statistics 23. First, a repeated  
239 measures analysis of variance (RM-ANOVA,  $\alpha=0.05$ ) was performed on the arm swing  
240 amplitude to test if the conditions indeed lead to the expected behavior and differed  
241 between conditions. Then, to test how arm swing (i.e. condition) affects energetics,  
242 repeated measures ANOVA was performed on the mean energy costs ( $\dot{E}$ ). Lastly, to see  
243 how arm swing affected kinetics (i.e. GRF and VAM), RM-ANOVAs were performed on the  
244 VAM and GRM. To test other possible influences, analysis of variance was also done for  
245 step width and step length. If there was a significant main effect, a post hoc paired t-test  
246 with Bonferroni correction was executed. Mauchly's test was used to test for violations of  
247 sphericity. If Mauchly's test was significant, the Greenhouse Geisser corrected values  
248 were reported.

249

### 250 *Data Availability*

251 All data, as well as the software used to analyze it, has been made available online.  
252 All files can be downloaded from: <https://doi.org/10.5281/zenodo.2671651>.

253

## 254 **RESULTS**

255 All participants ( $n=12$ ) successfully performed the 7 trials. Oxygen data was  
256 compromised in the first three participants, so the cost of transport has only been

257 evaluated in 9 participants. For one participant (#9), oxygen uptake data had to be  
258 redone at a later time. The experimental manipulation was successful, as clear effects of  
259 condition on arm swing amplitude were found (effect of condition,  $F_{condition}(2.23,$   
260  $24.54)=130.04$ ,  $p<.001$ , see **Fig. 1**). Post-hoc Bonferroni analysis showed that all  
261 conditions differed significantly from each other ( $p\leq.001$ ) except for the three *extra*  
262 conditions amongst themselves,  $p>.05$ ).

263

### 264 **Cost of Transport**

265 The cost of transport was higher in conditions with a smaller arm swing amplitude  
266 ( $F_{condition}(6,48)=11.95$ ,  $p<.001$ , see also **Fig. 2**). Post-hoc analysis showed that *in-phase*  
267 and *extra III* had a significantly higher cost of transport compared to *normal*  
268 (respectively +15.3% and +17.5%,  $p<.05$ ). *In-phase* the cost of transport was also  
269 significantly higher than *passive*, *extra I* and *extra II* ( $p<.05$ ), and *extra III* also had a  
270 higher cost of transport compared to both other *extra* arm swing conditions.

271

### 272 **Vertical Angular Momentum**

273 The conditions with a lower arm swing amplitude yielded higher whole-body VAM  
274 values ( $F_{condition}(2.67, 29.37)=21.70$ ,  $p<.001$ , see also **Fig. 3A-B**). Post-hoc analysis  
275 showed significantly higher VAM than normal in *in-phase* (+88.45%,  $p=.008$ ), *passive*  
276 (+53.64%,  $p<.001$ ) and *active* (+56.78%,  $p<.001$ ) and significantly lower VAM than  
277 normal in *extra II* (-28.16%,  $p=.03$ ). The VAM in the conditions *extra I* and *extra III*  
278 were non-significantly lower than normal (respectively -16.61% and -7.98%,  $p>.05$ ).

279 Apart from looking at the whole-body VAM, the contributions of the arms and the  
280 legs can be quantified separately as well. The VAM of the arms was significantly higher  
281 for conditions with higher arm swing amplitudes ( $F_{condition}(2.16, 23.80)=38.59$ ,  $p<.001$ ,  
282 see also **Fig. 3C-D**). The VAM of the legs fell just short of a significant relation  
283 ( $F_{condition}(2.27, 25.01)=3.00$ ,  $p=.062$ , see also **Fig. 3E-F**).

284

## 285 **Ground Reaction Moments**

286 The conditions with a lower arm swing amplitude had higher GRM values  
287 ( $F_{condition}(1.61, 17.74)=25.69, p<.001$ , see also **Fig. 4**). Post-hoc analysis showed  
288 significantly higher GRM than normal during *in-phase* (+53.62%,  $p=.033$ ) and *passive*  
289 (+21.33%,  $p<.001$ ) and *active* (+15.64%,  $p=.004$ ), and significantly lower VAM than  
290 normal during *extra II* (-21.96%,  $p=.013$ ) and *extra III* (-25.68%,  $p=.044$ ). The GRM in  
291 *extra I* was non-significantly lower than normal (-12.03%  $p>.05$ ).

292

## 293 **Step Parameters**

294 Several step parameters have also been analyzed (see **Fig. 5**). Step width  
295 differences over the conditions showed a similar pattern as the ML GRF. There was a  
296 significant effect of condition for the step width ( $F_{condition}(1.92, 21.14)= 4.91, p=.005$ ),  
297 with post-hoc differences between *active* and the three extra arm swing conditions (all  
298  $p<.05$ ) as well as between *passive* and *extra III* ( $p=.002$ ).

299 Stride length was lowest in normal walking and increased as arm swing amplitude  
300 changed, resulting in a significant difference between conditions ( $F_{condition}(6, 66)=13.85$ ,  
301  $p<.001$ ).

302

## 303 **DISCUSSION**

304 This study investigated the relationship between arm swing amplitude and cost of  
305 transport during walking, as well as the role of vertical angular momentum and ground  
306 reaction moment in this process. Results support the first and second hypothesis that  
307 state that when arm swing amplitude increases, VAM, and GRM decrease, albeit not for  
308 the largest arm swing amplitude. However, these changes did not always lead to an  
309 accompanying decrease in the cost of transport. Therefore, hypothesis 3 and 4 were not  
310 supported by the data.

311

312 *Influence of arm swing on VAM (hypothesis 1)*

313           Increases in arm swing amplitude were accompanied by a decrease in whole-body  
314 VAM, in accordance with hypothesis 1, in all but one case (*extra III*). Since the arms and  
315 legs produce angular momenta opposite in sign, VAM production by the arms can  
316 compensate for VAM production at the legs. In normal walking and walking with  
317 decreased arm swing, the legs generate more momentum than the arms, leading to a  
318 net whole-body VAM unequal to zero. The extra VAM generated at the arms through the  
319 higher arm swing amplitude manages to reduce the whole-body VAM toward zero.  
320 However, it could also lead to an overcompensation and carry the VAM past zero. Further  
321 increases will then lead to an increase in VAM magnitude. In conditions where the arms  
322 overcompensated, we found a concurrent small increase in the VAM generated by the  
323 legs, which counteracted the overcompensation and kept total VAM above zero. This  
324 extra VAM from the legs may have been caused by changes in step parameters: both  
325 step width and step length increased for conditions with extra arm swing amplitude  
326 (discussed later).

327           Similar results for the changes in whole-body VAM were found by Collins et al.  
328 (2009a) who investigated anti-normal, held and bound arm swing (cf. *in-phase*, *active*,  
329 and *passive*) in comparison to normal walking. They found a similar pattern between  
330 conditions for the peak whole-body momentum as in-phase led to the highest VAM,  
331 normal to the lowest, and the two restricted arm swings in between. This was again due  
332 to an increase in VAM from the arms, while the contribution remained fairly constant  
333 across these conditions, similar to findings in the current study. Comparable results were  
334 also found in a study investigating walking in children with cerebral palsy. The  
335 participants showed a smaller arm swing amplitude on the affected side and higher  
336 angular momentum contributions by the legs. This was compensated by an increased  
337 arm swing on the unaffected side, so no changes in total body angular momentum were  
338 seen (Bruijn et al., 2011). To the best of our knowledge, no studies exist that investigate  
339 the influence of increased arm swing on VAM. One study (Thielemans et al., 2014)  
340 investigated the influence of adding weight to the arms, which should counter VAM by  
341 the legs in a similar way as increasing the amplitude. This study found that increasing

342 the weight worn on the arms did not lead to a significant decrease in whole-body VAM,  
343 but this might be explained by the fact that the weight was only added to one wrist,  
344 rather than symmetrically. Thus, the participants might have compensated differently to  
345 remove asymmetries in the walking pattern or actuation thereof.

346 As mentioned before, we see a deviation in the general trend for extra III in the  
347 mean absolute value. Surprisingly, this increase relative to the preceding conditions is  
348 not observed in the graph of VAM is expressed as a function of the gait cycle percentage  
349 (**Fig. 3A**). This could be explained by the different strategies the participants used for  
350 this condition. In 5 out of 12 participants, the employed arm swing led to an  
351 overcompensation, meaning that the VAM crossed the zero and had a magnitude  
352 comparable to normal but with opposite direction. In other participants, the employed  
353 strategy actually led to an increased whole-body VAM (with the same direction as  
354 normal). Visual inspection of the walking patterns showed that some participants (#1,7  
355 and 12) did not move their arms back all the way behind their body, rather they kept  
356 their arms in front of them thereby reducing the effectiveness of the arms in reducing the  
357 angular momentum. Participants (#4, 12) also had trouble staying in anti-phase during  
358 this condition due to different oscillation frequencies for their arms and legs, which could  
359 lead to the arms actually increasing the angular momentum in the usual direction rather  
360 than reducing it. Thus, walking with extra arm swing led to overcompensation in some  
361 participants, and increased whole-body VAM in others (see example data in **Fig. 6**). This  
362 led to a mean around zero when the non-absolute values over the cycle were calculated,  
363 but a higher magnitude absolute mean. For 3 out of 12 participants the whole-body VAM  
364 for *extra III* was around zero.

365

### 366 *Influence of arm swing on GRM (hypothesis 2)*

367 Similar to VAM, there was also a reduction in GRM visible for the conditions with a  
368 larger arm swing amplitude, thereby supporting the second hypothesis. This finding was  
369 not unexpected as the ground reaction moment is proportional to the time derivative of

370 the VAM, and the VAM has a sinusoidal shape with similar periods for all conditions (N.B.  
371 the GRM is not an exact derivative in this case as they are not calculated about the same  
372 point).

373 The current findings are in agreement with previous studies. Collins et al. (2009a)  
374 found an increased peak vertical GRM when the hands were held or bound at the side  
375 during walking (cf. *active* and *passive* conditions), and an even further increase for in-  
376 phase walking compared to normal walking. Li et al. (2001) investigated the effect of  
377 arm fixation during walking on the ground reaction moment, and found that the GRM  
378 during walking with arm fixation (cf. *passive*) was significantly higher compared to  
379 normal walking in males, but not females.

380

#### 381 *Consequences for the Cost of Transport (hypotheses 3 and 4)*

382 The changes seen in VAM and GRM support the idea that VAM can be regulated via  
383 either arm swing or GRM. However, reducing VAM and GRM would only be favorable if  
384 these changes led to a decrease in cost of walking, as postulated in hypotheses 3 and 4.  
385 We found a pattern where the cost of transport decreased up until condition extra I  
386 (slightly more arm swing than normal). It should be noted that not all post-hoc  
387 differences were significant (see **Fig. 2**). When arm swing amplitude was increased  
388 beyond *extra I*, we found an increase in cost of transport, despite a reduction in VAM  
389 (from *extra I* to *extra II*) and GRM. This increase in cost of transport in the largest arm  
390 swing conditions is most likely the result of the increased cost of swinging the arms. This  
391 cost goes up as arm swing amplitude increases, due to an increasing moment arm of  
392 gravity. Furthermore, as the arm elevation goes up, the same change in arm (shoulder)  
393 angle will lead to a smaller change in horizontal amplitude (i.e. the slope of a cosine  
394 function gets smaller when approaching the peak). Taken together: the energy costs go  
395 up, while the gain goes down at larger arm elevations. These findings lead to the  
396 conclusion that hypothesis 3 and 4 should be rejected as they only hold for certain

397 conditions. Rather, a parabolic relation between arm swing amplitude and energetic cost  
398 was found.

399 Notwithstanding the rejection of hypothesis 3 and 4 (for increased arm swing  
400 amplitudes), findings for reduced arm swing amplitudes agree with findings from  
401 previous studies. Collins et al. (2009a) found lowest metabolic energy for the normal  
402 walking condition, which increased 7% respectively 12% for the bound and held  
403 conditions (cf. *passive* and *active* that were +3.93% and +3.94% than normal in the  
404 current study). The cost of transport was highest in anti-normal arm swing(+26%, cf. *in-*  
405 *phase* which was +15.31% compared to normal in the current study) conditions.  
406 Umberger (2008) investigated the influence of walking with no arm swing on the cost of  
407 transport and found that walking with the arms folded over the chest led to a 7.7%  
408 increase in gross metabolic energy expenditure during walking. This is comparable to  
409 findings for walking without arm swing in the current study. To our knowledge, no  
410 previous studies investigated the role of increased arm swing on energetic costs so these  
411 findings cannot be compared.

412

#### 413 *Arm swing amplitude: a trade-off?*

414 From an evolutionary perspective, one could expect humans to walk with an  
415 optimized arm swing as there is evidence that humans optimize their walking behavior  
416 for energetic cost of transport (Holt et al., 1995; Ralston, 1958; Umberger and Martin,  
417 2007; Zarrugh and Radcliffe, 1978). However, walking with a larger arm swing amplitude  
418 than normal did not always lead to a significant increase in energetic cost. On the  
419 contrary, the energetic cost for walking with a lightly increased arm swing (*extra I*) was  
420 even somewhat lower than for walking with normal arm swing (non-significant difference,  
421  $p > .05$ ). Moreover, from the viewpoint of optimizing gait stability, a larger arm swing may  
422 be beneficial (Bruijn et al., 2010; Fei Hu et al., 2012; Nakakubo et al., 2014; Punt et al.,  
423 2015). On the other hand, when faced with a larger perturbation, arm swing itself may  
424 already be detrimental (although the response of the arms to the perturbation can



425 certainly help in recovery (Bruijn et al., 2011; Pijnappels et al., 2010)). Thus, maybe  
426 swinging the arms we do is the best trade-off between energetic cost, steady state gait  
427 stability, and maintaining the ability to respond appropriately in the face of larger  
428 perturbations.

429

### 430 *Study Limitations*

431 As mentioned above, participants walked with a lower step frequency for the  
432 conditions with larger arm swing. This was not an unexpected effect since it seems  
433 logical that if the arm swing amplitude increases, so will the step length to keep the  
434 velocity of arm swing in a preferable range. With a constant speed imposed by the  
435 treadmill this means that step frequency will go down. The change in step length might  
436 also be a reaction to the overcompensation of the VAM through the arms, in order to  
437 counteract it. In either case, the changes in these step parameters can potentially  
438 influence current findings. It has been shown that individuals tend to walk with a  
439 preferred speed-frequency relation and that deviation from this optimal relation can lead  
440 to an increase in cost of transport (Bertram and Ruina, 2001). Therefore, the cost of  
441 transport for the *extra* arm swing amplitudes and *in-phase* are potentially higher due to  
442 participants walking with a non-optimal step frequency. Step length also appears to  
443 influence VAM, with smaller steps leading to a lower whole-body VAM (Thielemans et al.,  
444 2014), when walking with normal arm swing amplitude. Beside the changes in step  
445 frequency and step length, the step width also changed during the different arm swing  
446 conditions, becoming larger in the non-normal arm swing conditions. These changes can  
447 have an independent influence on the cost of transport. Donelan et al. (2001) found a  
448 45% higher energetic cost of transport when people walk with a wider step width  
449 compared to their preferred step width, and an 8% higher energetic cost for walking with  
450 a smaller step width. Thus, the higher cost of transport found in the normal arm swing  
451 conditions might be in part due to the wider step width that people walk with, in these  
452 conditions.

453 All participants walked with a constant average speed of 1.25 m/s. The speed of  
454 walking has been shown to have an effect on the vertical angular momentum in both  
455 human experiments (Thielemans et al., 2014) as well as in modeling studies (Collins et  
456 al., 2009a). Therefore, the effect of increasing arm swing could be different for other  
457 walking speeds.

458

## 459 **CONCLUSION**

460 This study explored the relation between arm swing amplitude, vertical angular  
461 momentum, ground reaction moment and cost of transport by having participants walk  
462 with different styles and amplitudes of arm swing. Our findings support the hypotheses  
463 that VAM and GRM decrease with increasing arm swing amplitude (resp. hypotheses 1  
464 and 2). The decrease in total VAM is the result of the increase VAM contribution of the  
465 arms, that can now compensate for a larger part of the VAM generated by the legs. In  
466 some cases, this led to an overcompensation.

467 Cost of transport was optimal around normal and slightly increased arm swing  
468 amplitudes. The hypothesis that the reduced VAM and GRM lead to a decreased cost of  
469 transport was confirmed up until this optimal point. Increasing arm swing beyond that  
470 led to an increased cost of transport, most likely due to the disproportional increase in  
471 cost of swinging the arms.

472 In conclusion, increasing arm swing amplitude leads to a reduction in vertical angular  
473 moment and ground reaction moments. However, this is not always useful in terms of  
474 cost of transport, which is congruent with the evolutionary concept of metabolically  
475 optimized walking. It might, however, provide useful if one wants to decrease the ground  
476 reaction moment, for instance to alleviate the legs in lower extremity disorders. Normal  
477 or slightly increased arm swing amplitude appears to be optimal in young and healthy  
478 individuals. This natural arm swing might be the best trade-off between energetic cost,  
479 steady state gait stability, and the ability to respond to larger gait perturbations.

480

481 **ACKNOWLEDGEMENTS**

482 SMB was funded by a VIDI grant (016.Vidi.178.014) from the Dutch Organization for  
483 Scientific Research (NWO).

484

485 **LIST OF SYMBOLS AND ABBREVIATIONS**

|                       |                                                               |
|-----------------------|---------------------------------------------------------------|
| <i>a</i>              | Distance (m)                                                  |
| <b>ap</b>             | anteroposterior                                               |
| <b>COM</b>            | Center of Mass                                                |
| <b>COP</b>            | Center of Pressure                                            |
| <i>E</i>              | Energy consumption in (W) or (W kg <sup>-1</sup> )            |
| <i>g</i>              | Gravitational constant                                        |
| <b>GRF</b>            | Ground Reaction Force (N)                                     |
| <b>GRM</b>            | Ground Reaction Moment (Nm)                                   |
| <i>I</i>              | Inertia tensor                                                |
| <i>l</i>              | Leg length (m)                                                |
| <i>L</i>              | Angular Momentum (Nms)                                        |
| <i>m</i>              | mass (kg)                                                     |
| <b>ml</b>             | Mediolateral                                                  |
| <i>M<sub>z</sub></i>  | Total vertical moment around the origin of the force platform |
| <i>r</i>              | Position Vector (m)                                           |
| <b>RER</b>            | Respiratory Exchange Ratio                                    |
| <b>RM-ANOVA</b>       | Repeated Measures Analysis of Variance                        |
| <i>s</i>              | Number of segments                                            |
| <i>v</i>              | Velocity Vector                                               |
| <b>VAM</b>            | Vertical Angular Momentum (Nms)                               |
| <b>VO<sub>2</sub></b> | Oxygen Uptake (ml s <sup>-1</sup> )                           |
| <i>ω</i>              | Angular velocity (rad s <sup>-1</sup> )                       |

486

487 **REFERENCES**

- 488 **Bertram, J. E. A. and Ruina, A.** (2001). Multiple walking speed-frequency relations are predicted  
489 by constrained optimization. *J. Theor. Biol.* **209**, 445–453.
- 490 **Bruijn, S. M., Meijer, O. G., van Dieën, J. H., Kingma, I. and Lamoth, C. J. C.** (2008).  
491 Coordination of leg swing, thorax rotations, and pelvis rotations during gait: The organisation  
492 of total body angular momentum. *Gait Posture* **27**, 455–462.
- 493 **Bruijn, S. M., Meijer, O. G., Beek, P. J. and van Dieën, J. H.** (2010). The effects of arm swing  
494 on human gait stability. *J. Exp. Biol.* **213**,.
- 495 **Bruijn, S. M., Meyns, P., Jonkers, I., Kaat, D. and Duysens, J.** (2011). Control of angular  
496 momentum during walking in children with cerebral palsy. *Res. Dev. Disabil.* **32**, 2860–2866.
- 497 **Collins, S. H., Adamczyk, P. G. and Kuo, A. D.** (2009a). Dynamic arm swinging in human  
498 walking. *Proc. Biol. Sci.* **276**, 3679–88.
- 499 **Collins, S. H., Adamczyk, P. G. and Kuo, A. D.** (2009b). Dynamic arm swinging in human  
500 walking. *Proc. Biol. Sci.* **276**, 3679–88.
- 501 **Donelan, J. M., Kram, R. and Kuo, A. D.** (2001). Mechanical and metabolic determinants of the

- 502 preferred step width in human walking. *Proc. R. Soc. B Biol. Sci.* **268**, 1985–1992.
- 503 **Eltman, H.** (1939). The Function of the Arms in Walking. *Hum. Biol.* **11**, 529–535.
- 504 **Fei Hu, Dong-Yun Gu, Jin-Ling Chen, Yu Wu, Bing-Chen An and Ke-Rong Dai** (2012).
- 505 Contribution of arm swing to dynamic stability based on the nonlinear time series analysis
- 506 method. In *2012 Annual International Conference of the IEEE Engineering in Medicine and*
- 507 *Biology Society*, pp. 4831–4834. IEEE.
- 508 **Fernandez-Ballesteros, M. L., Buchthal, F., Rosenfalck, P., Ballesteros, M. L. F., Buchthal,**
- 509 **F. and Rosenfalck, P.** (1965). The Pattern of Muscular Activity During the Arm Swing of
- 510 Natural Walking. *Acta Physiol. Scand.* **63**, 296–310.
- 511 **Garby, L. and Astrup, A.** (1987). The relationship between the respiratory quotient and the
- 512 energy equivalent of oxygen during simultaneous glucose and lipid oxidation and lipogenesis.
- 513 *Acta Physiol. Scand.* **129**, 443–444.
- 514 **Gerdy, P. N.** (1829). Memoires sur le mecanisme de la marche de l’homme. *J. Physiol.*
- 515 *experimentale Pathol.* **9**, 1–28.
- 516 **Goudriaan, M., Jonkers, I., Van Dieen, J. H. and Bruijn, S. M.** (2014). Arm swing in human
- 517 walking: What is their drive?
- 518 **Herr, H. and Popovic, M.** (2008). Angular momentum in human walking. *J. Exp. Biol.* **211**, 467–
- 519 481.
- 520 **Hinrichs, R. N.** (1990). Whole body movement: coordination of arms and legs in walking and
- 521 running. *Mult. Muscle Syst. springer New York* 694–705.
- 522 **Hof, A. L.** (2007). The equations of motion for a standing human reveal three mechanisms for
- 523 balance. *J. Biomech.* **40**, 451–457.
- 524 **Holt, K. G., Jeng, S. F., Ratcliffe, R. and Hamill, J.** (1995). Energetic Cost and Stability during
- 525 Human Walking at the Preferred Stride Frequency. *J. Mot. Behav.* **27**, 164–178.
- 526 **Jackson, K. M., Joseph, J. and Wyard, S. J.** (1978). A mathematical model of arm swing during
- 527 human locomotion. *J. Biomech.* **11**, 277–289.
- 528 **Kubo, M., Wagenaar, R. C., Saltzman, E. and Holt, K. G.** (2004). Biomechanical mechanism for
- 529 transitions in phase and frequency of arm and leg swing during walking. *Biol. Cybern.* **91**, 91–
- 530 8.
- 531 **Kuhtz-Buschbeck, J. P. and Jing, B.** (2012). Activity of upper limb muscles during human
- 532 walking. *J. Electromyogr. Kinesiol.* **22**, 199–206.
- 533 **Li, Y., Wang, W., Crompton, R. H. and Gunther, M. M.** (2001). Free vertical moments and
- 534 transverse forces in human walking and their role in relation to arm-swing. *J. Exp. Biol.* **204**,
- 535 47–58.
- 536 **Marigold, D. S., Bethune, A. J. and Patla, A. E.** (2002). Role of the Unperturbed Limb and Arms
- 537 in the Reactive Recovery Response to an Unexpected Slip During Locomotion. *J. Neurophysiol.*
- 538 **89**, 1727–1737.
- 539 **Meyns, P., Bruijn, S. M. and Duysens, J.** (2013). The how and why of arm swing during human
- 540 walking. *Gait Posture* **38**, 555–562.
- 541 **Morton, D. J. and Fuller, D. D.** (1952). *Human locomotion and body form: a study of gravity*
- 542 *and man*. Baltimore: The Williams & Wilkins Company.
- 543 **Murray, M. P., Sepic, S. B. and Barnard, E. J.** (1967). Patterns of sagittal rotation of the upper
- 544 limbs in walking. *Phys. Ther.* **47**, 272–84.
- 545 **Nakakubo, S., Doi, T., Sawa, R., Misu, S., Tsutsumimoto, K. and Ono, R.** (2014). Does arm
- 546 swing emphasized deliberately increase the trunk stability during walking in the elderly
- 547 adults? *Gait Posture* **40**, 516–520.
- 548 **Ortega, J. D., Fehلمان, L. A. and Farley, C. T.** (2008). Effects of aging and arm swing on the
- 549 metabolic cost of stability in human walking. *J. Biomech.* **41**, 3303–8.
- 550 **Park, J.** (2008). Synthesis of natural arm swing motion in human bipedal walking. *J. Biomech.* **41**,
- 551 1417–1426.
- 552 **Pijnappels, M., Kingma, I., Wezenberg, D., Reurink, G. and van Dieën, J. H.** (2010). Armed
- 553 against falls: The contribution of arm movements to balance recovery after tripping. *Exp.*
- 554 *Brain Res.* **201**, 689–699.
- 555 **Pontzer, H., Holloway, J. H., Raichlen, D. A. and Lieberman, D. E.** (2009). Control and
- 556 function of arm swing in human walking and running. *J. Exp. Biol.* **212**, 523–534.
- 557 **Punt, M., Bruijn, S. M., Wittink, H. and van Dieën, J. H.** (2015). Effect of arm swing strategy
- 558 on local dynamic stability of human gait. *Gait Posture* **41**, 504–509.
- 559 **Ralston, H. J.** (1958). Energy-speed relation and optimal speed during level walking. *Int.*
- 560 *Zeitschrift für Angew. Physiol. Einschl. Arbeitsphysiologie* **17**, 277–283.
- 561 **Thielemans, V., Meyns, P. and Bruijn, S. M.** (2014). Is angular momentum in the horizontal
- 562 plane during gait a controlled variable? *Hum. Mov. Sci.* **34**, 205–216.
- 563 **Umberger, B. R.** (2008). Effects of suppressing arm swing on kinematics, kinetics, and energetics
- 564 of human walking. *J. Biomech.* **41**, 2575–2580.
- 565 **Umberger, B. R. and Martin, P. E.** (2007). Mechanical power and efficiency of level walking with

- 566 different stride rates. *J. Exp. Biol.* **210**, 3255–3265.
- 567 **Weber, W. and Weber, E.** (1836). *Mechanik der menschlichen Gewerkezeuge. Dietrichsche*
- 568 *Buchhandlung.*
- 569 **Witte, H., Preuschoft, H. and Recknagel, S.** (1991). Human body proportions explained on the
- 570 basis of biomechanical principles. *Z. Morphol. Anthropol.* **78**, 407–23.
- 571 **Zarrugh, M. Y. and Radcliffe, C. W.** (1978). Predicting metabolic cost of level walking. *Eur. J.*
- 572 *Appl. Physiol. Occup. Physiol.* **38**, 215–223.
- 573 **Zehr, E. P. and Duysens, J.** (2004). Regulation of arm and leg movement during human
- 574 locomotion. *Neuroscientist* **10**, 347–61.
- 575
- 576

577 **Fig. 1. Mean arm swing amplitude (m) per condition.** Error bars indicate the 95% Confidence Interval.  
578 Horizontal bars show significant differences between conditions ( $n=12$ ,  $p<.05$ , paired t-test with bonferroni and  
579 Greenhouse Geisser correction). Abbreviations: I=in-phase, P=passive (restricted), A=active (restricted),  
580 N=normal, E=extra.

581  
582 **Fig. 2. The mean cost of transport ( $J\text{ kg}^{-1}\text{ m}^{-1}$ ) per condition.** Error bars indicate the 95% Confidence  
583 Interval. Horizontal bars show significant differences between conditions ( $n=9$ ,  $p<.05$ , paired t-test with  
584 bonferroni correction). Abbreviations: I=in-phase, P=passive (restricted), A=active (restricted), N=normal,  
585 E=extra.

586  
587 **Fig. 3. Vertical angular momentum.** (A, C, and E) show the mean VAM for all seven trials as a function of  
588 the gait cycle (starting and ending with left heel strike), for whole-body VAM, VAM originating from the arms,  
589 and VAM originating from the legs respectively. (B, D, and F) show the mean absolute values for whole body-  
590 VAM and VAM originating from the arms and legs. Error bars indicate the 95% Confidence Interval. Horizontal  
591 bars show significant differences between conditions ( $n=12$ ,  $p<.05$ , paired t-test with bonferroni and  
592 Greenhouse Geisser correction). Abbreviations: I=in-phase, P=passive (restricted), A=active (restricted),  
593 N=normal, E=extra.

594  
595 **Fig. 4. Ground Reaction Moment.** (A) shows the mean GRM for all seven trials over one gait cycle from left  
596 heel strike to the next heel strike. (B) Shows the mean absolute GRM averaged over all participants per  
597 condition. Error bars indicate the 95% Confidence Interval. Horizontal bars show significant differences between  
598 conditions ( $n=12$ ,  $p<.05$ ). Abbreviations: I=in-phase, P=passive (restricted), A=active (restricted), N=normal,  
599 E=extra.

600  
601 **Fig. 5. Potential confounders for the relation between VAM/GRM and Cost of Transport.** (A) Shows  
602 the mean step width. (B) shows the stride frequency. (C) shows the low-frequency drift of the participant's  
603 position. Error bars indicate the 95% Confidence Interval. Horizontal bars show significant differences between  
604 conditions ( $n=12$ ,  $p<.05$ , paired t-test with bonferroni correction, and Greenhouse Geisser correction for step  
605 width. Abbreviations: I=in-phase, P=passive (restricted), A=active (restricted), N=normal, E=extra.

606  
607 **Fig. 6. Participants used different strategies to execute the extra III condition, leading to different**  
608 **results for the whole-body VAM.** Each of the three panels above shows one strategy to execute the extra III  
609 condition: the left panel, increased VAM, was seen in 4 participants, the results of participant #1 are shown. In  
610 the panel in the middle the participants had a whole-body VAM around zero, 3 participants used this strategy  
611 and the results of participant #10 are shown in this panel. The other 5 participants had an overcompensation  
612 due to the extra arm swing, the results of participant #5 are shown in the right panel.

613

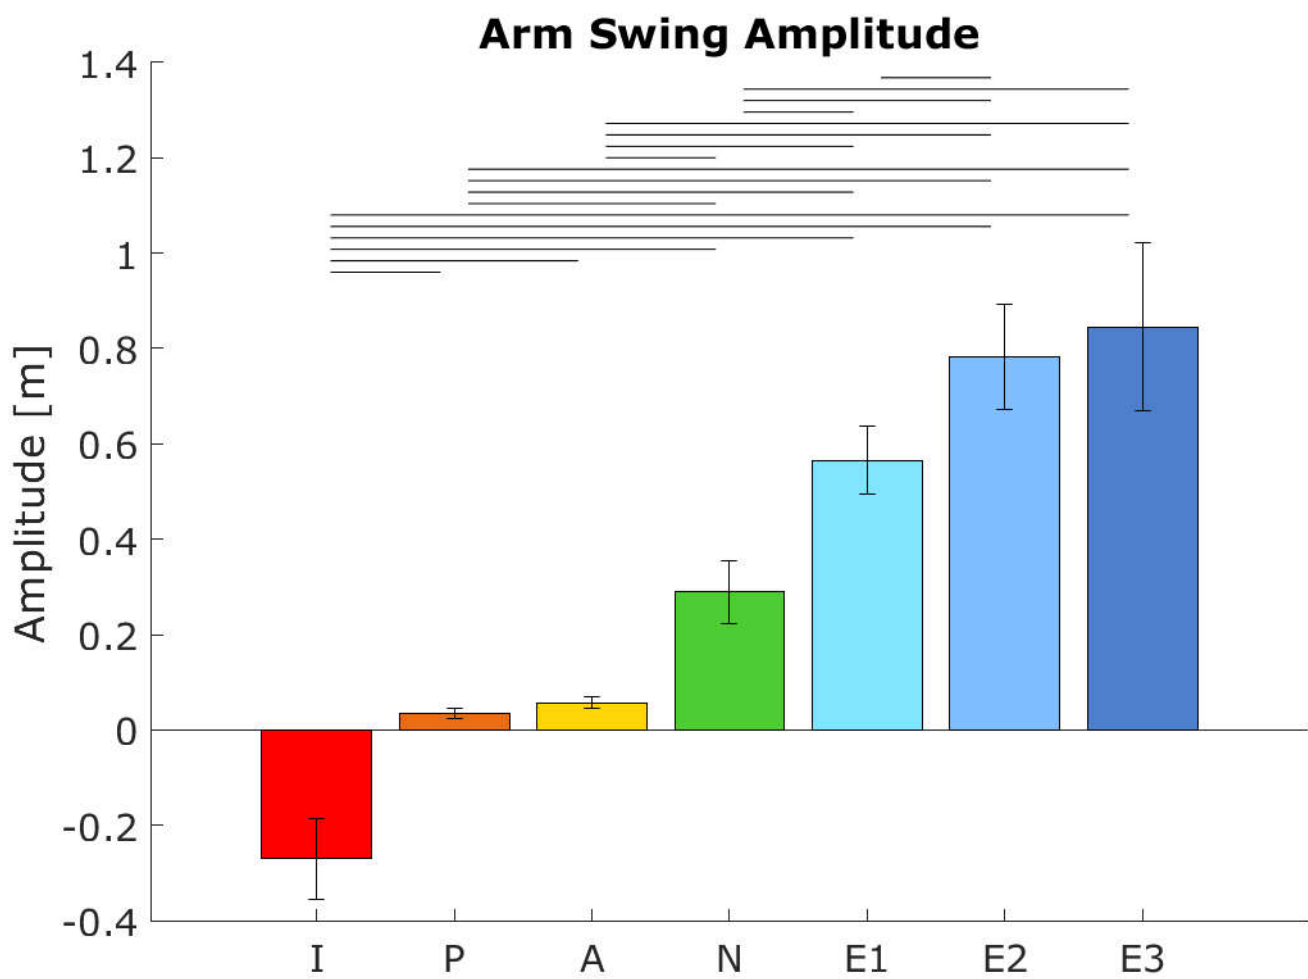

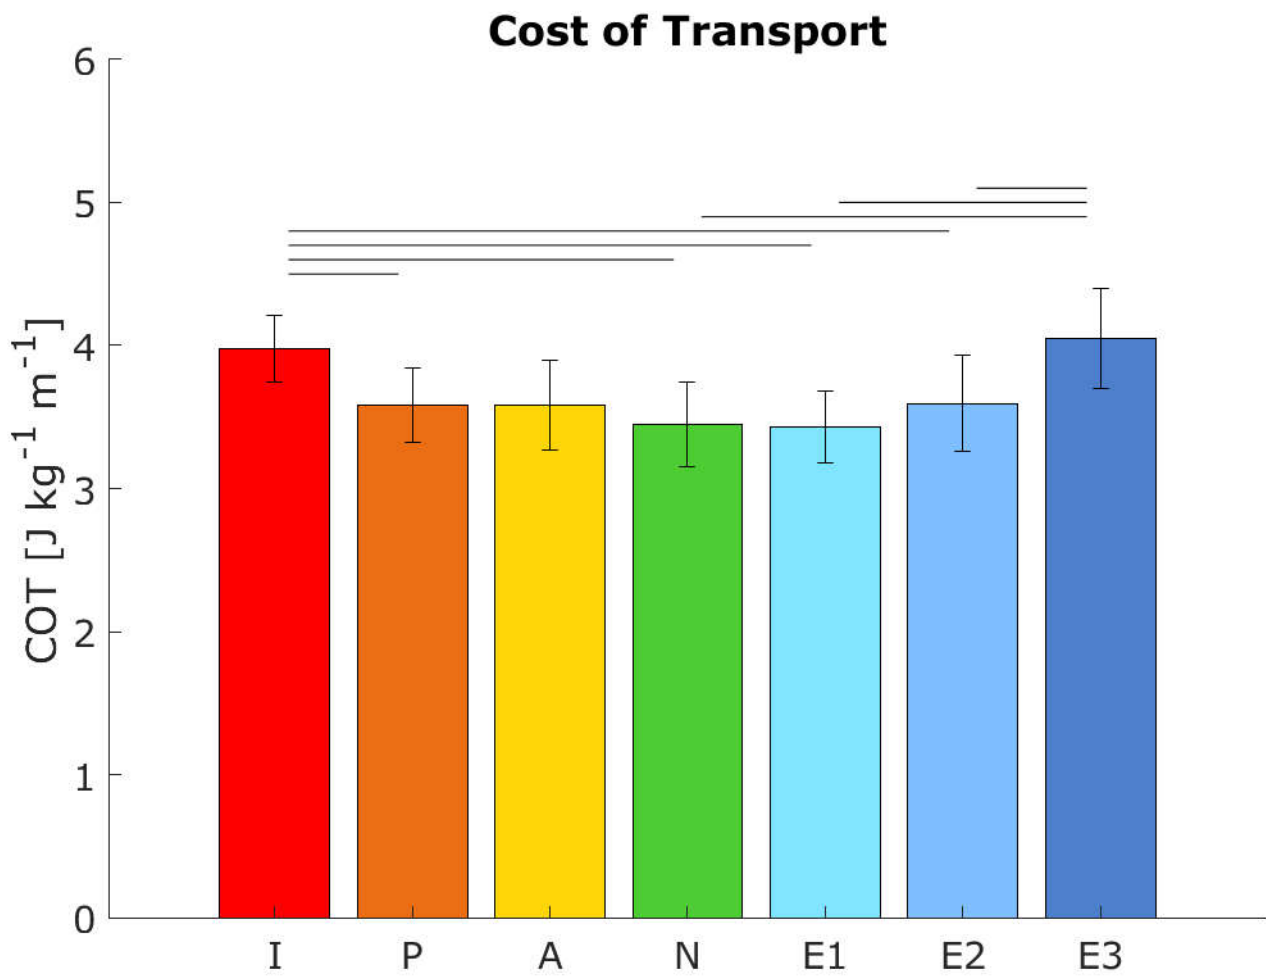



**A Whole-Body VAM**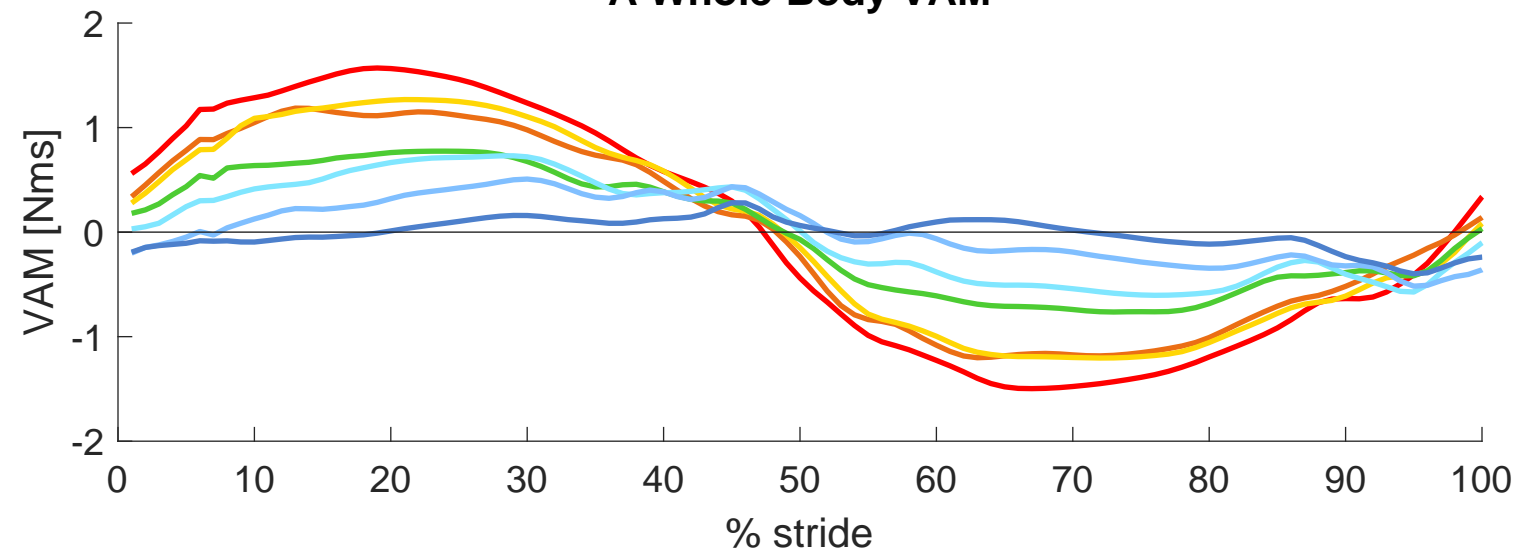**B Mean Whole-Body VAM**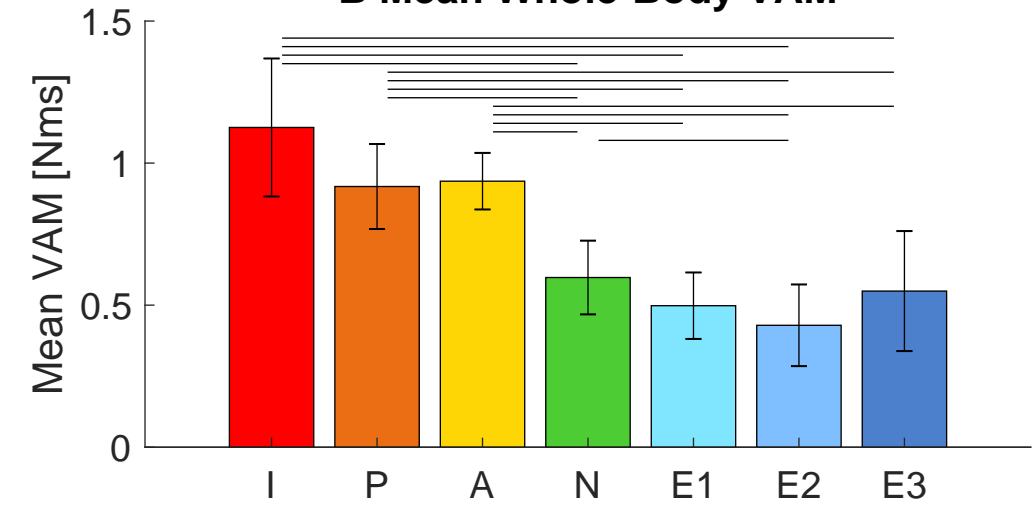**C. VAM Arms**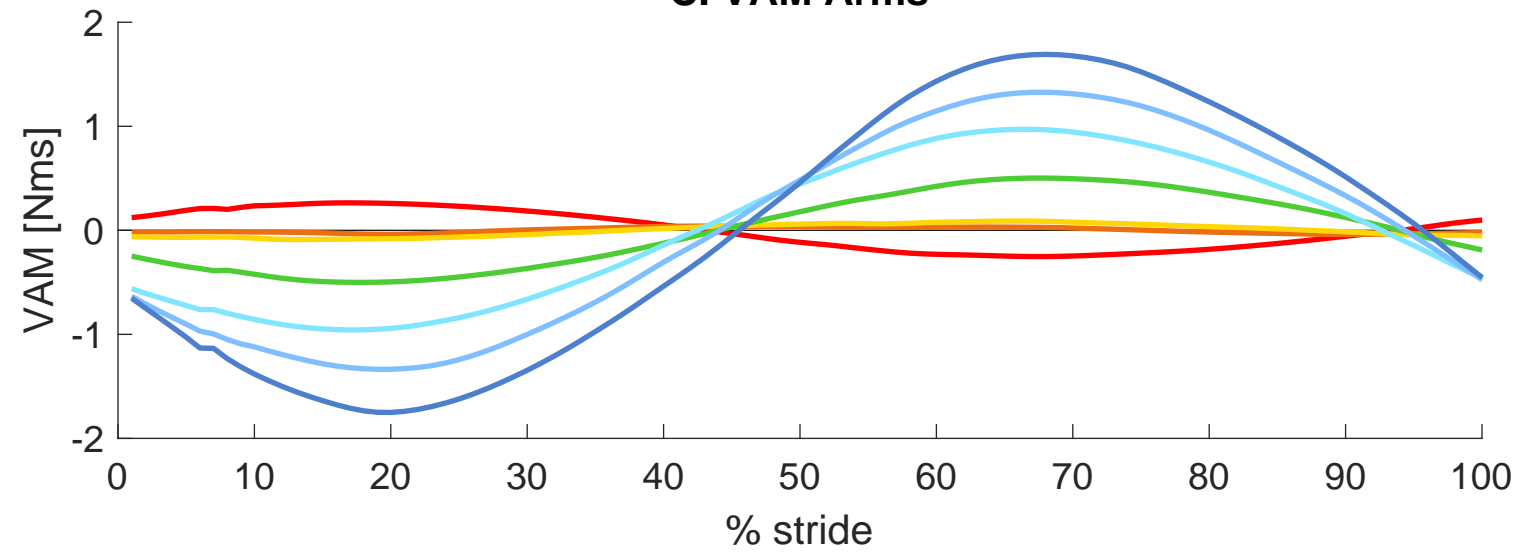**D. Mean VAM Arms**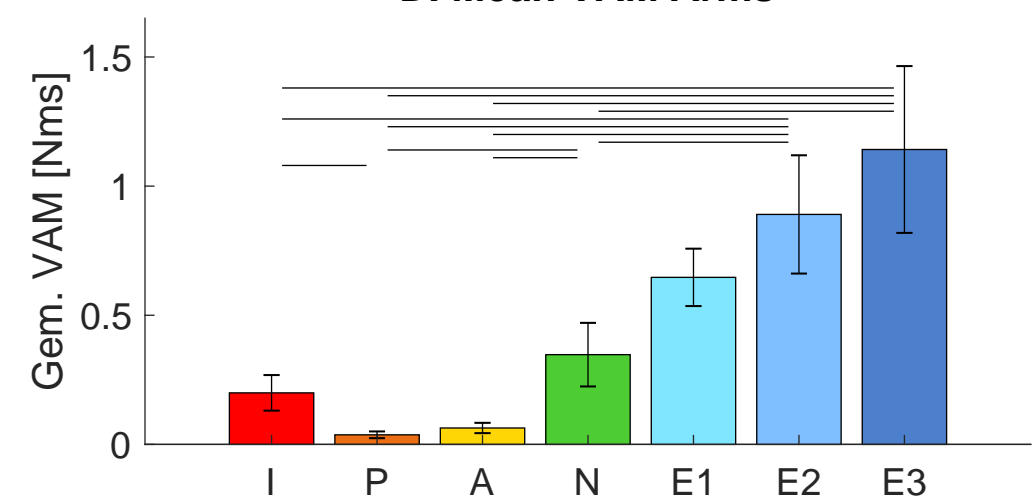**E. VAM Legs**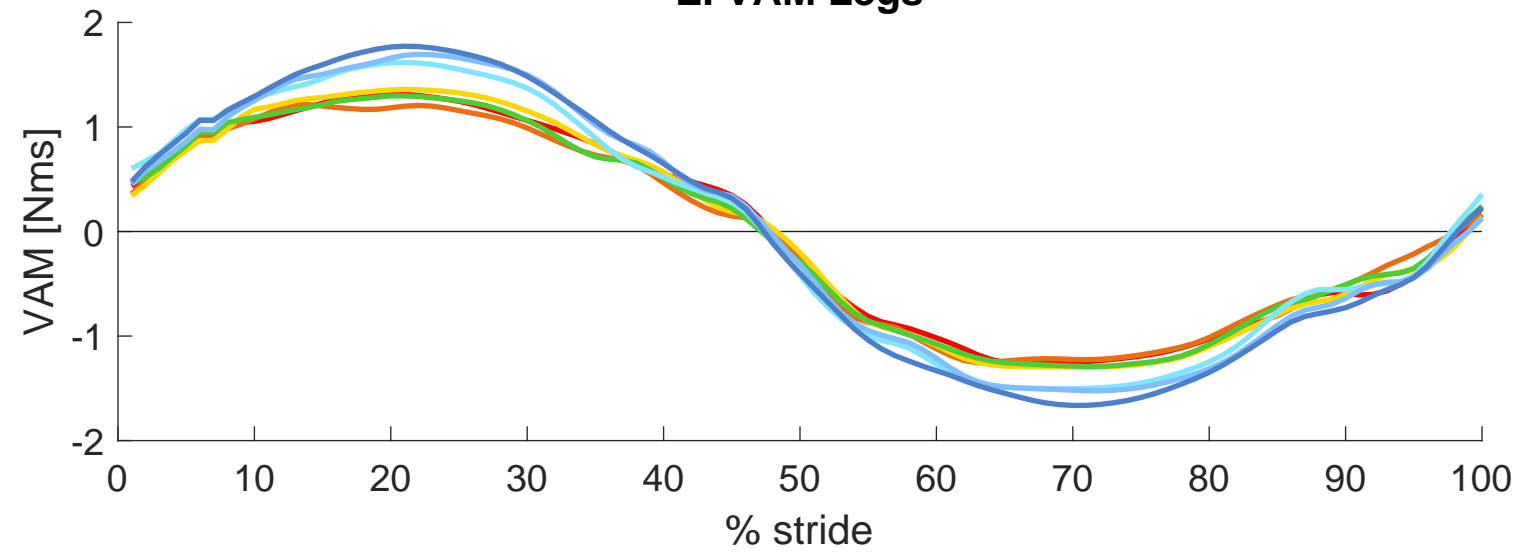**F. Mean VAM Legs**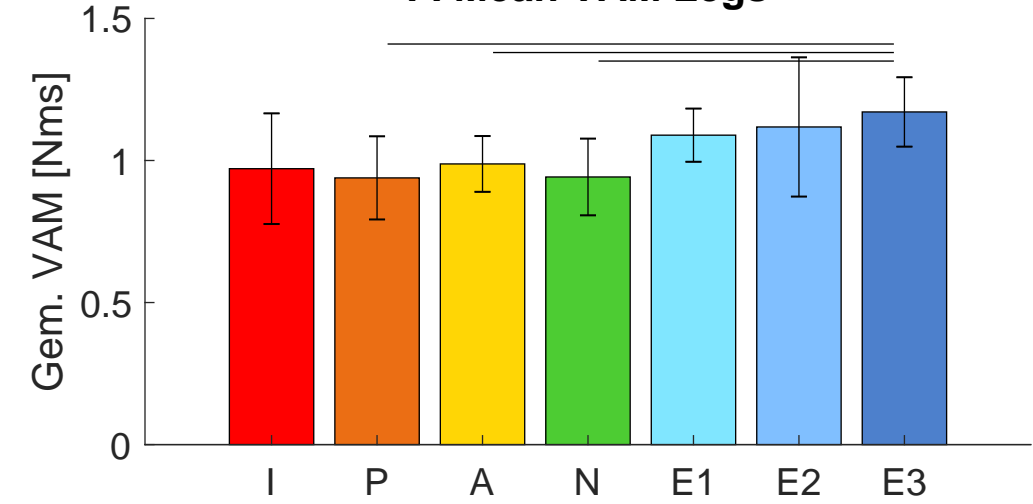

— In-phase — Passive — Active — Normal — Extra1 — Extra2 — Extra3

### A. Ground Reaction Moment

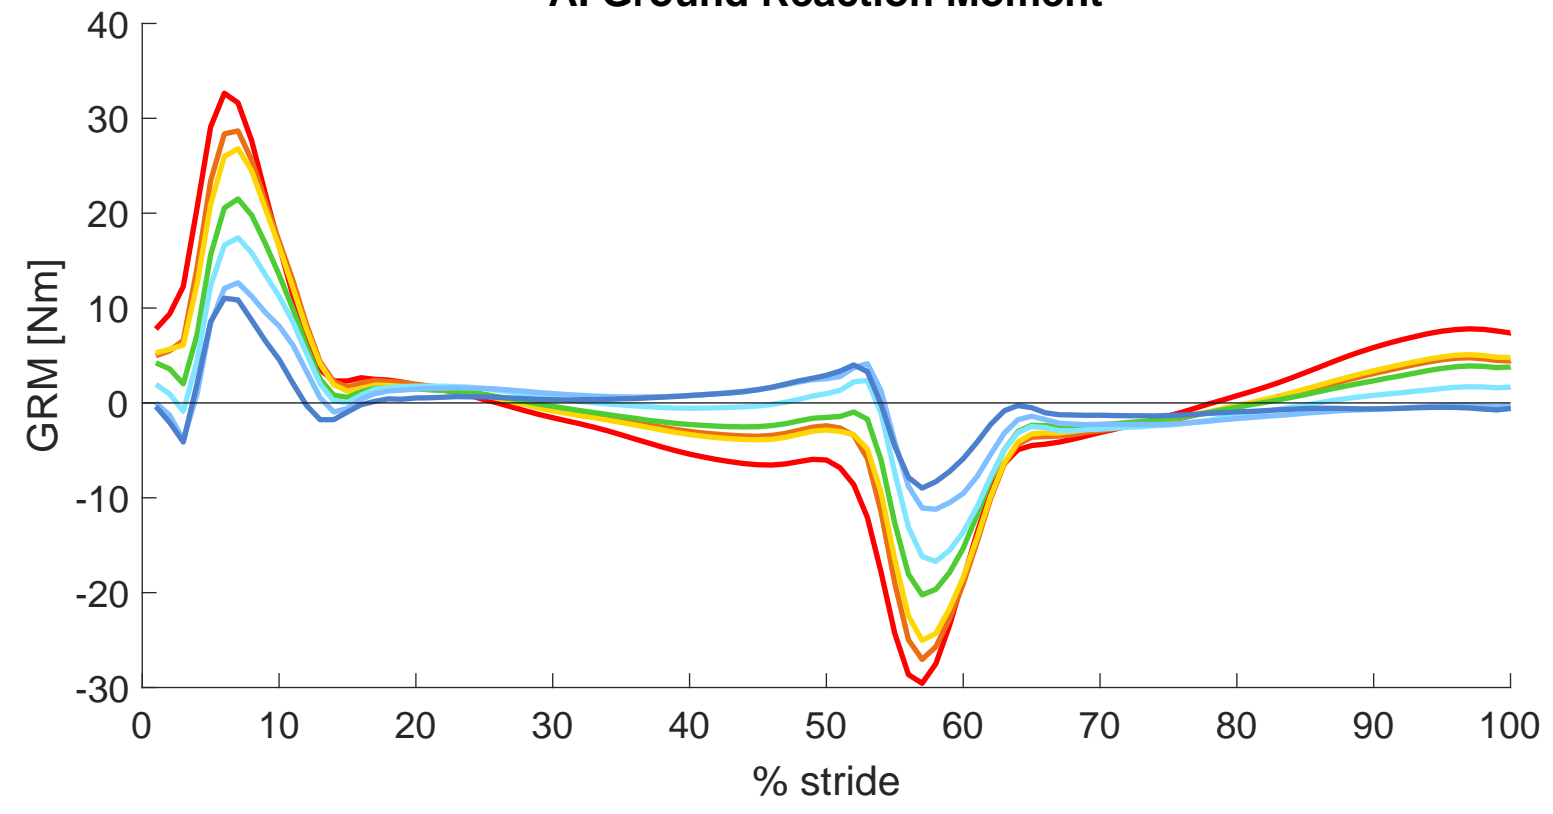

— In-phase — Passive — Active — Normal — Extra1 — Extra2 — Extra3

### B. Ground Reaction Moment

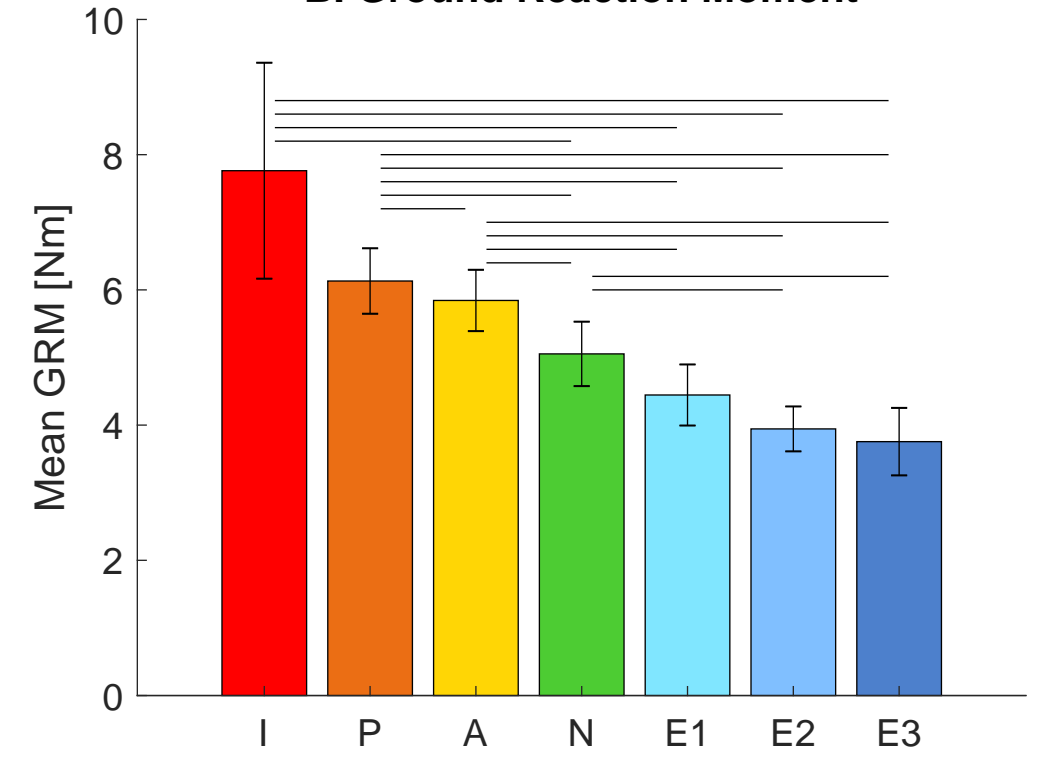

**Step width**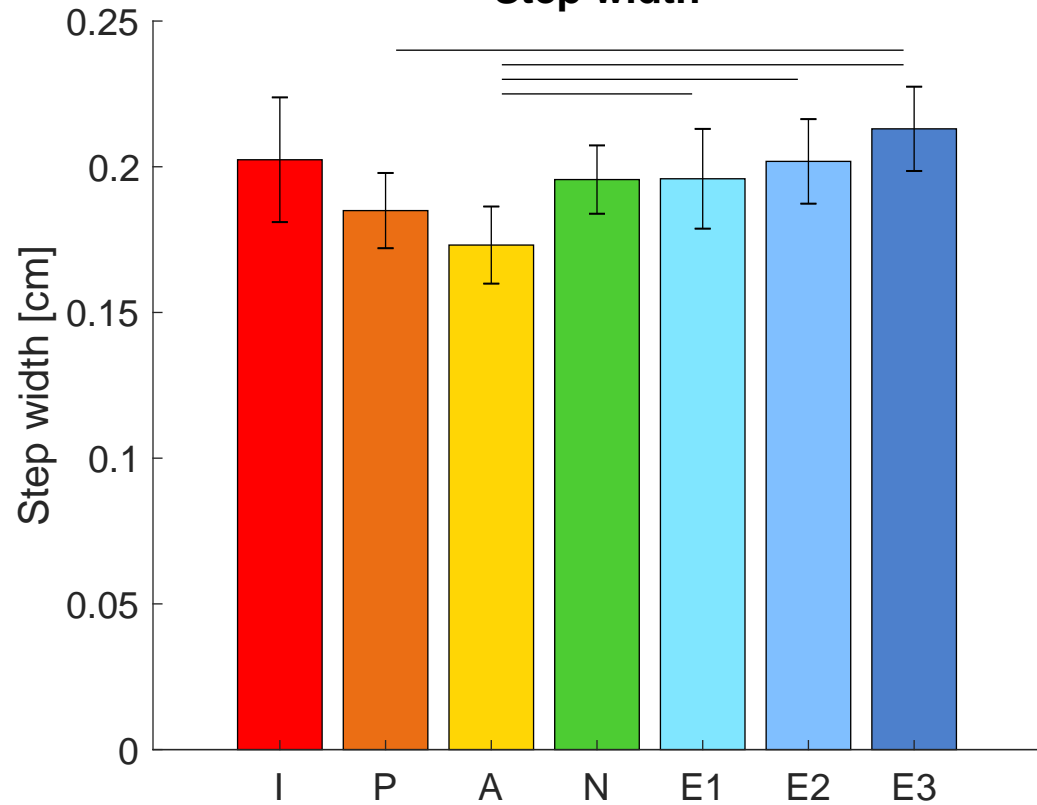**Stride length**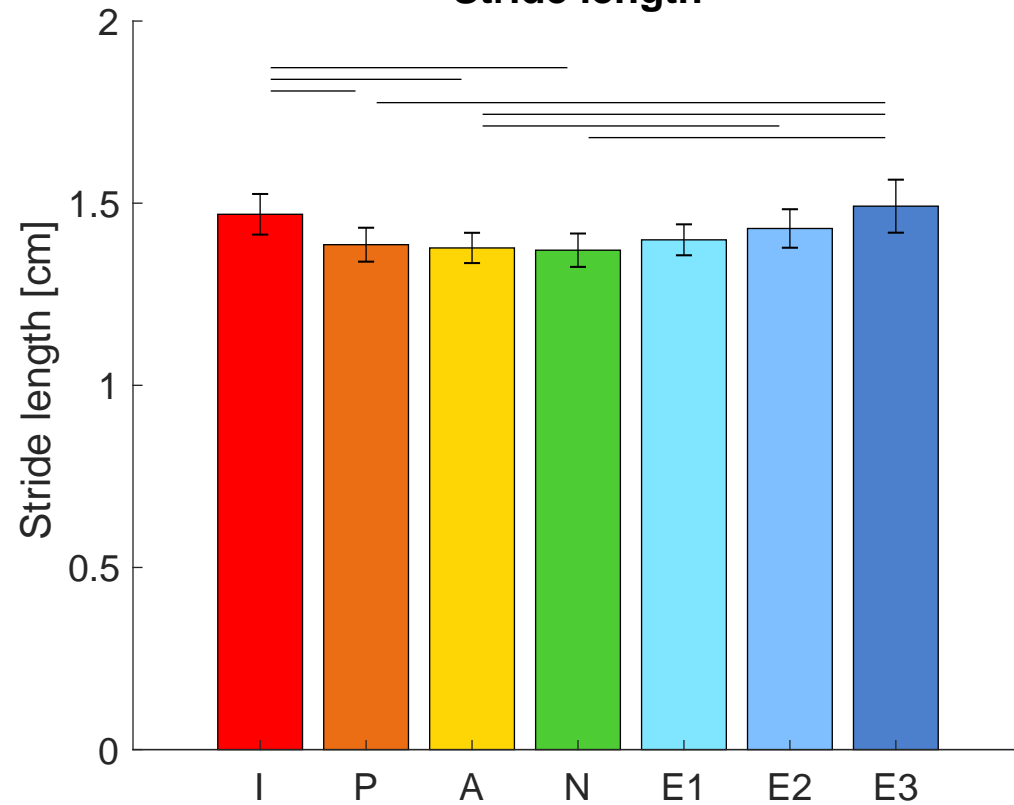

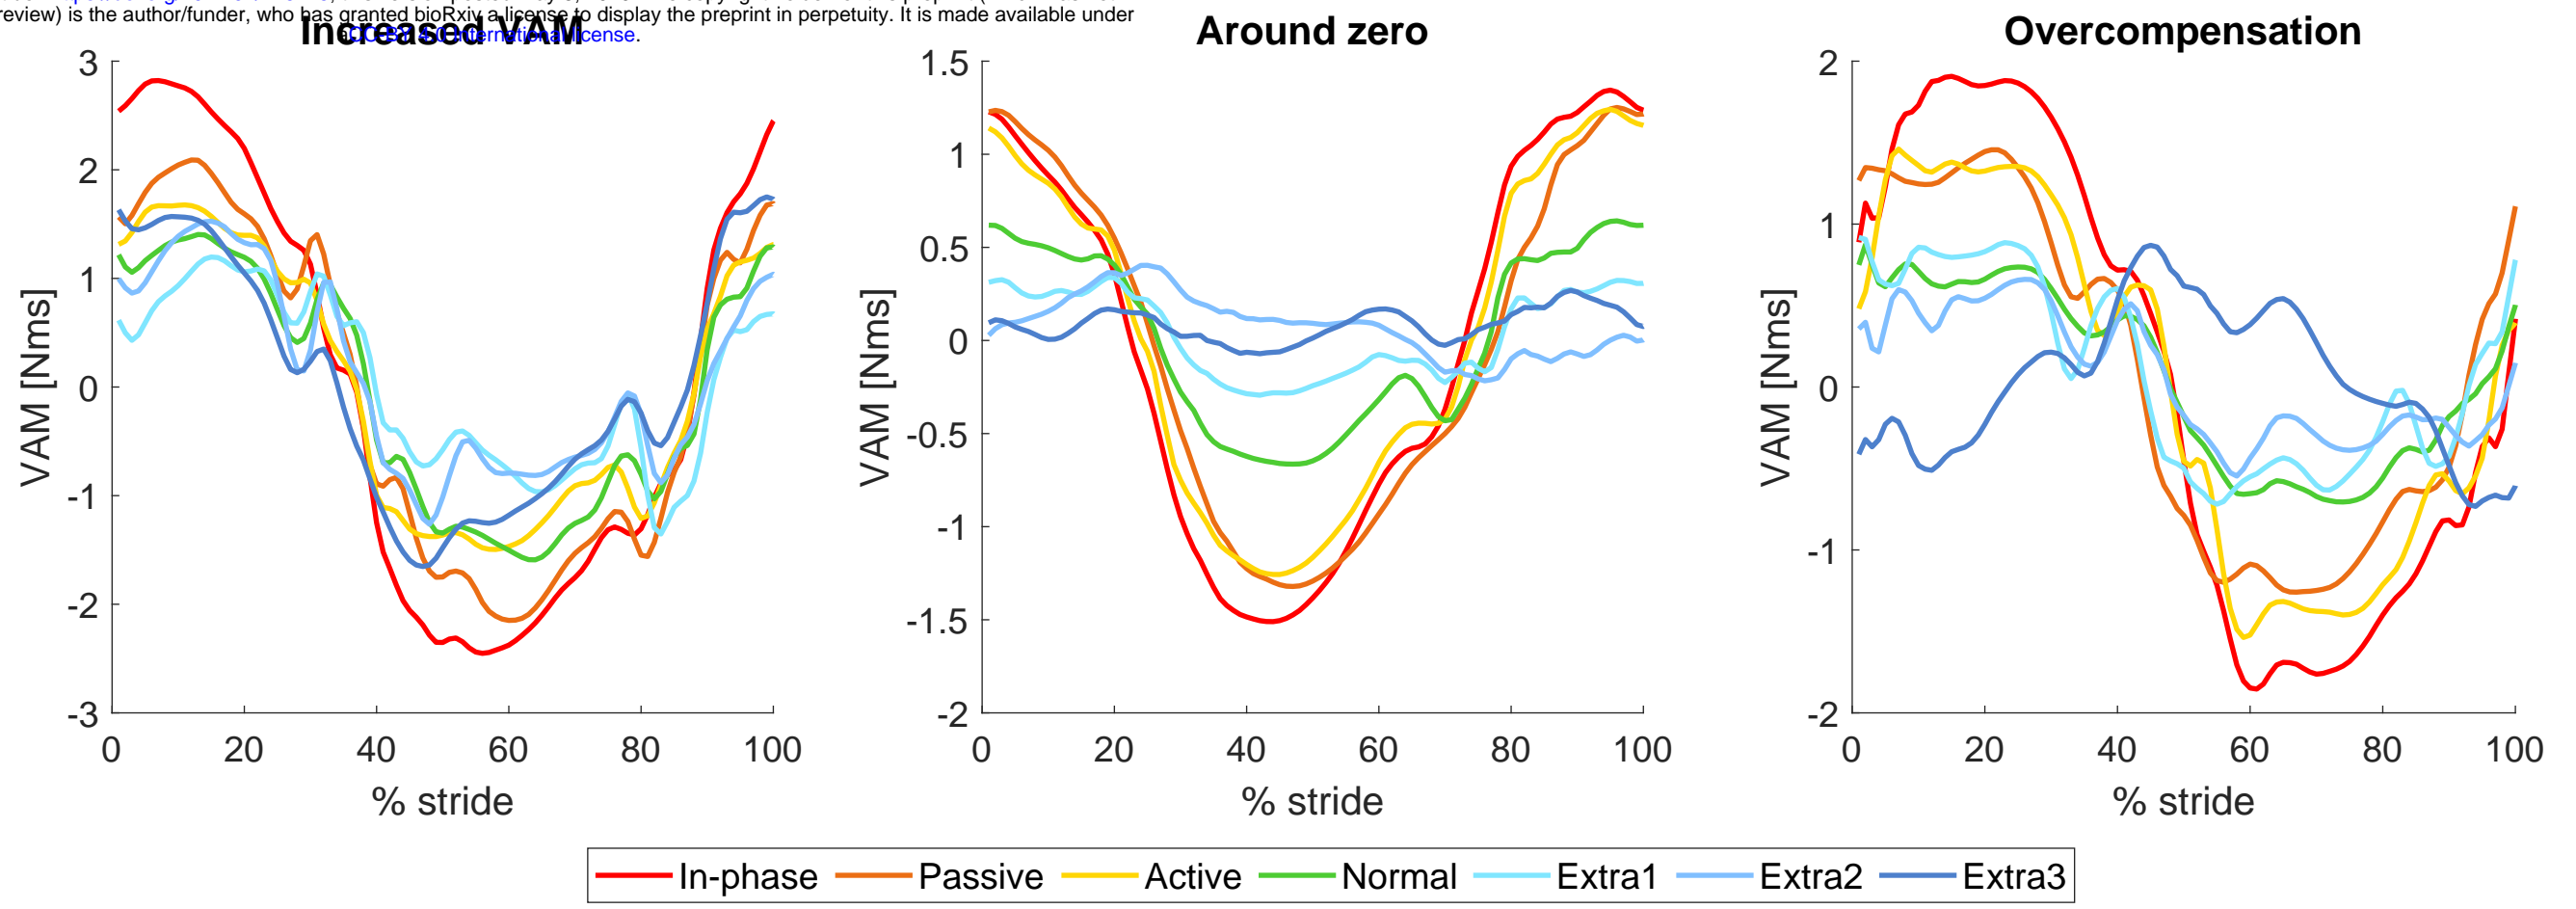

Source: https://www.biorxiv.org/content/10.1101/426775v2.full.pdf
